# Supplementary material
Source: publisher site journal article supplement (https://www.spandidos-publications.com/8521/downloadSupplementary)
Supplement: Supplementary file 1 [file downloadSupplementary]

Table SI. Radio-high-performance liquid chromatography monitoring conditions for precursor gallium-68 and fluorine-18.

| Time, min | Flow, ml/min | H <sub>2</sub> O % (0.1% TFA) | CH <sub>3</sub> CN % (0.1% TFA) |
|-----------|--------------|-------------------------------|---------------------------------|
| 0         | 1.0          | 80                            | 20                              |
| 1         | 1.0          | 80                            | 20                              |
| 8         | 1.0          | 20                            | 80                              |
| 10        | 1.0          | 80                            | 20                              |

TFA, trifluoroacetic acid.
